# Supplementary material for: ECM-Mimetic Nylon Nanofiber Scaffolds for Neurite Growth Guidance
Source: MDPI journal article supplement (doi:10.3390/nano11020516), 2021-02-18

## Supporting Information

Control

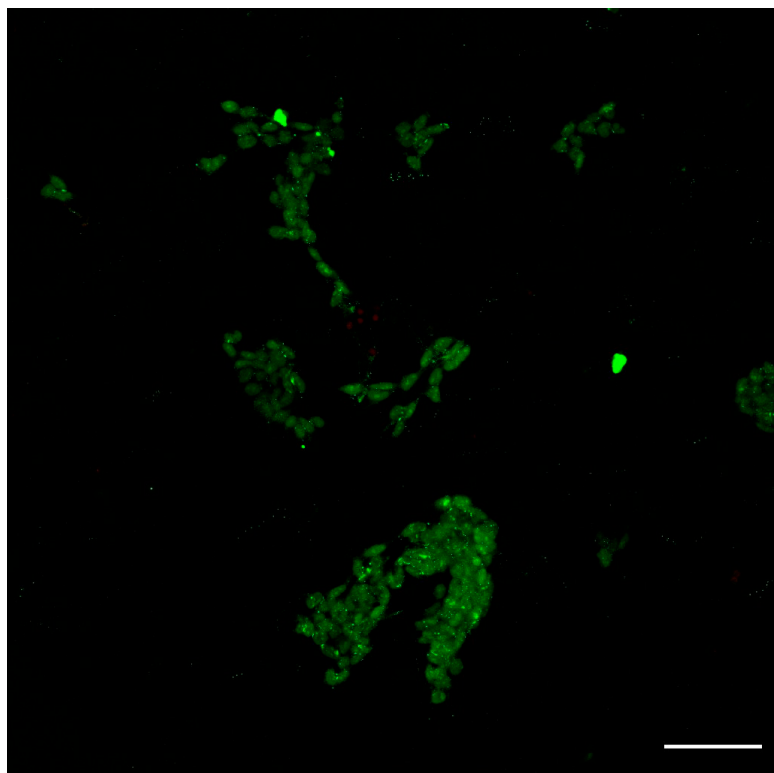

AU

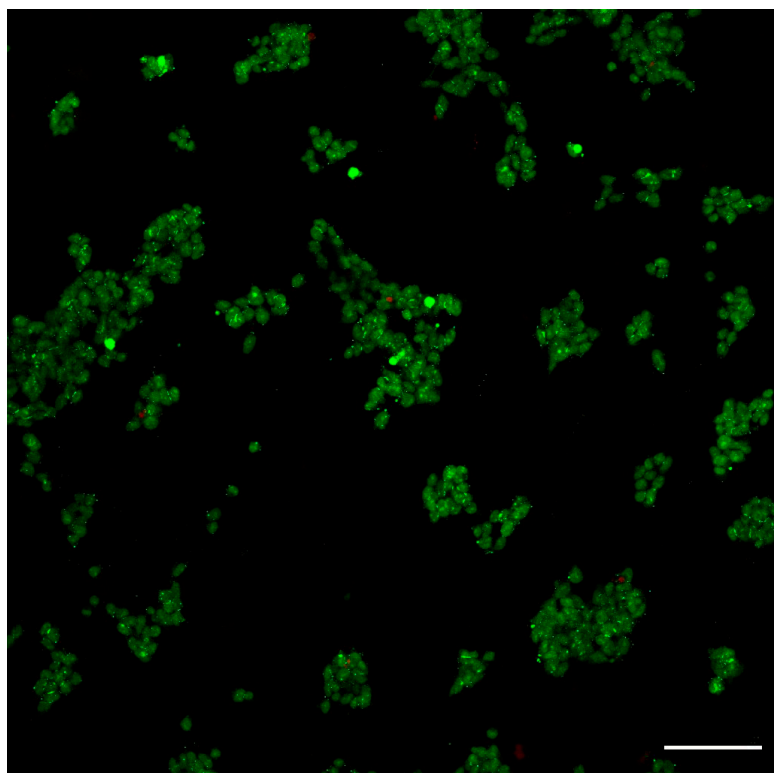

AS

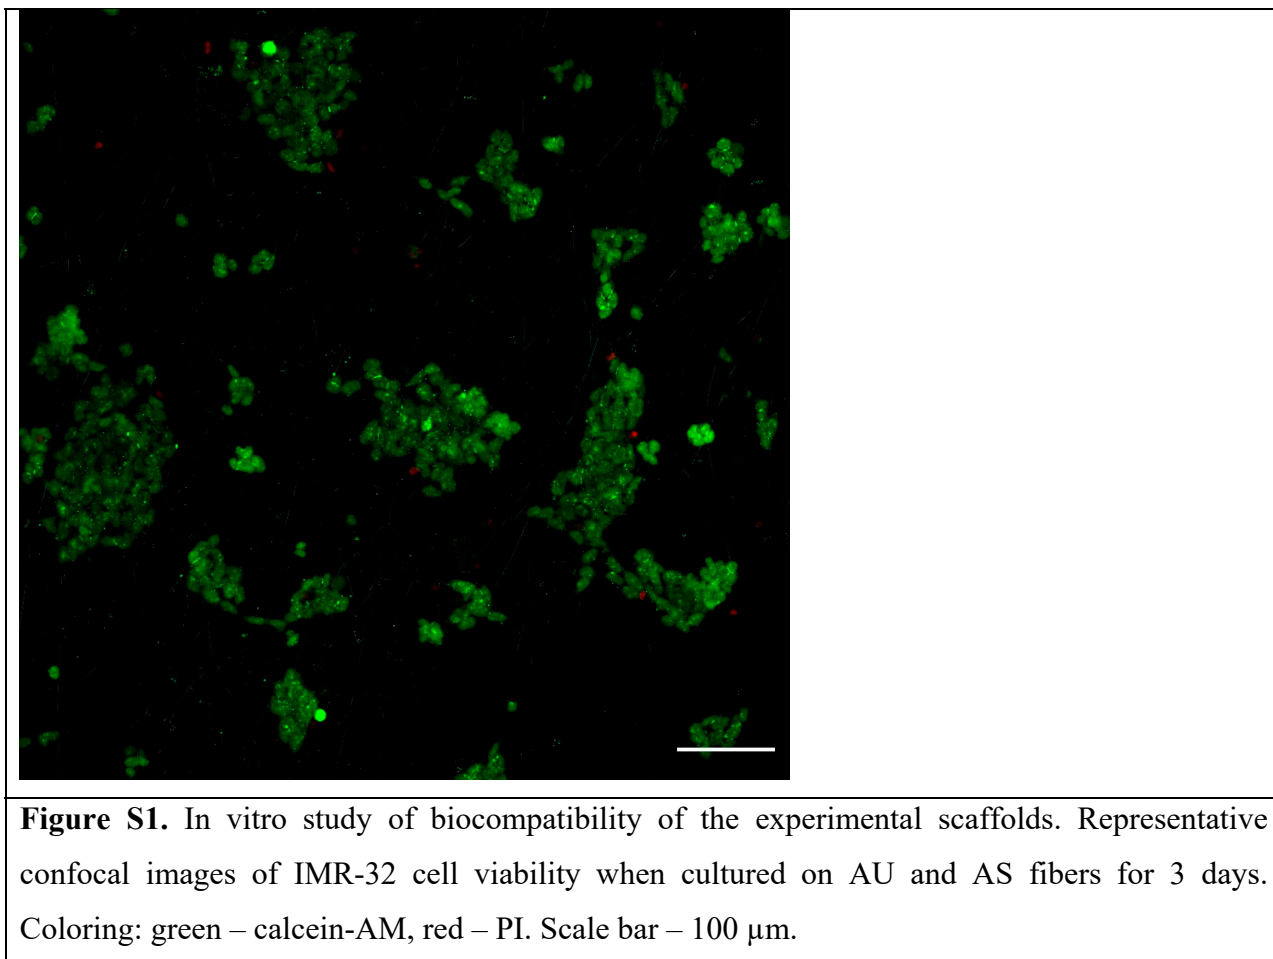

*Analysis of enzymatic degradation of nylon nanofibers and cytotoxicity of degradation products.*

As an additional criterion for the biocompatibility of scaffolds made of nylon-4,6 nanofibers, we studied degradation of nanofibers by collagenase, the main enzyme of the extracellular matrix (**Figure S1**). The degree of toxicity of the products of enzymatic degradation of nylon fiber scaffolds was also evaluated.

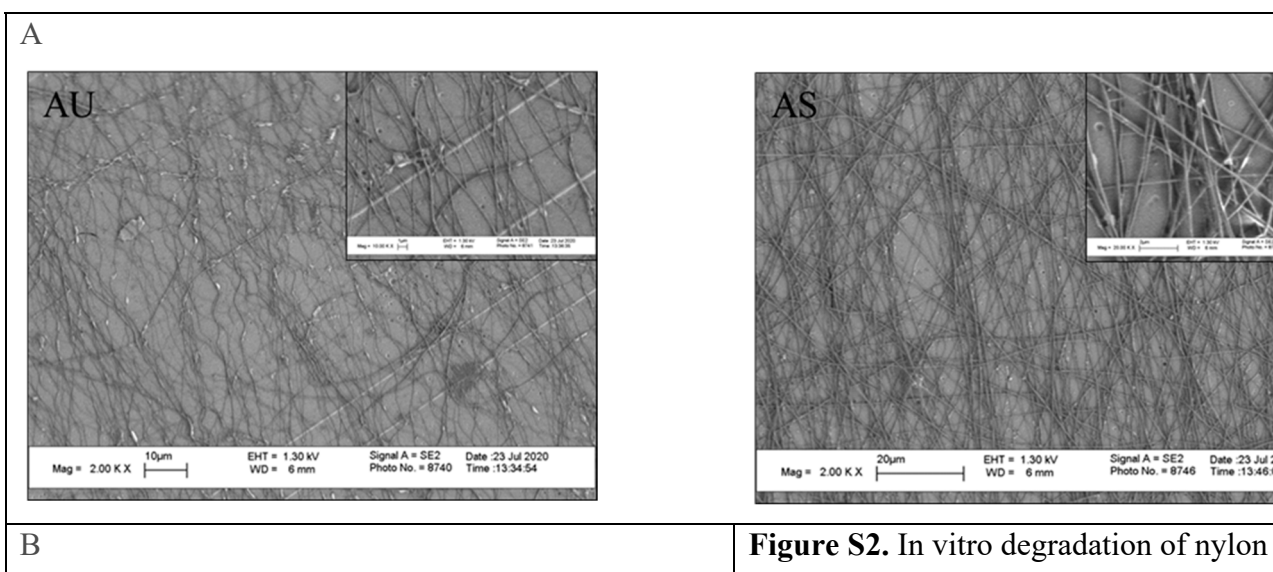

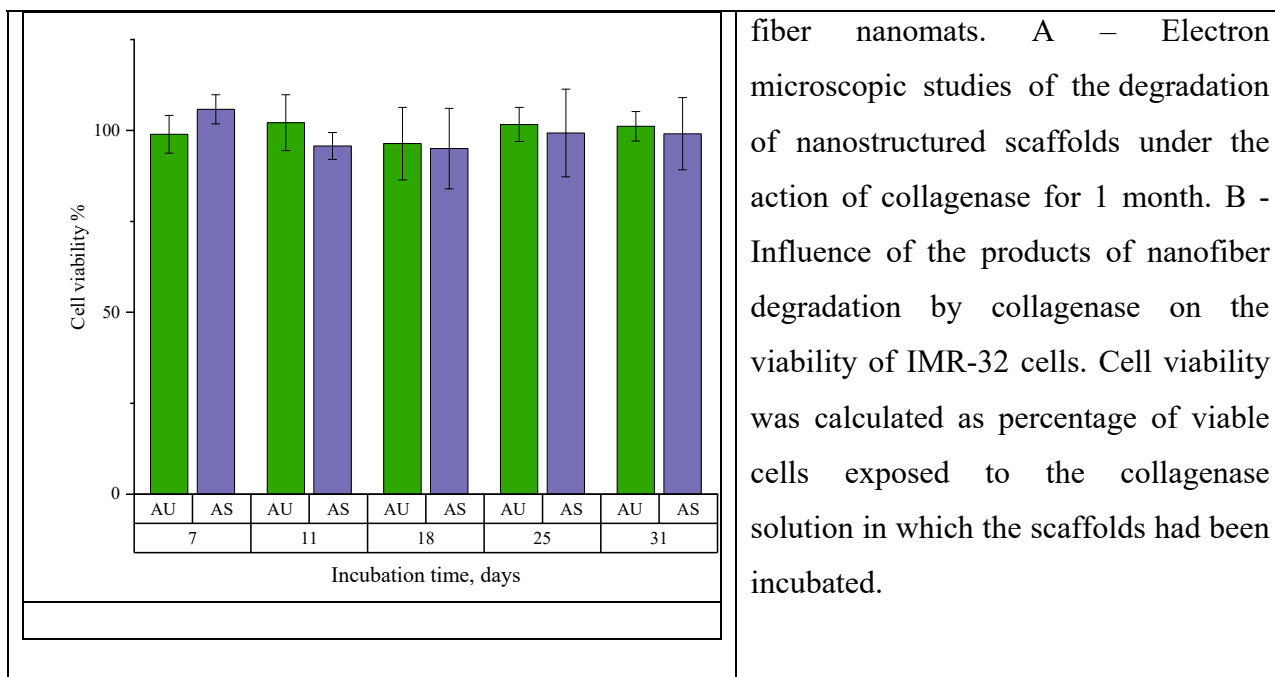

The SEM images showed that after incubation of the scaffolds in collagenase solution for a month, no significant destruction of nylon nanofibers occurred; at this point in time, no swelling of the polymer fibers has yet been observed. This means that these scaffolds are suitable for long-term operation. The results of the viability tests of human neuroblastoma IMR-32 cells incubated with collagenase solutions after incubation with nylon fibers are shown in **Figure S1B**.

No toxic effects or decrease in cell viability were observed when cells were subjected to supernatants containing potential products of scaffold degradation by the main ECM enzyme collagenase, which was inactivated prior to the essay (as described in the Methods section 2.9)

| Control                                                                             | AU                                                                                   | AS                                                                                    | RU                                                                                    |
|-------------------------------------------------------------------------------------|--------------------------------------------------------------------------------------|---------------------------------------------------------------------------------------|---------------------------------------------------------------------------------------|
| 1st day                                                                             |                                                                                      |                                                                                       |                                                                                       |
|    |    |    |    |
| 2nd day                                                                             |                                                                                      |                                                                                       |                                                                                       |
|    |    |    |    |
| 5th day                                                                             |                                                                                      |                                                                                       |                                                                                       |
|  |  |  |  |

**7th day**

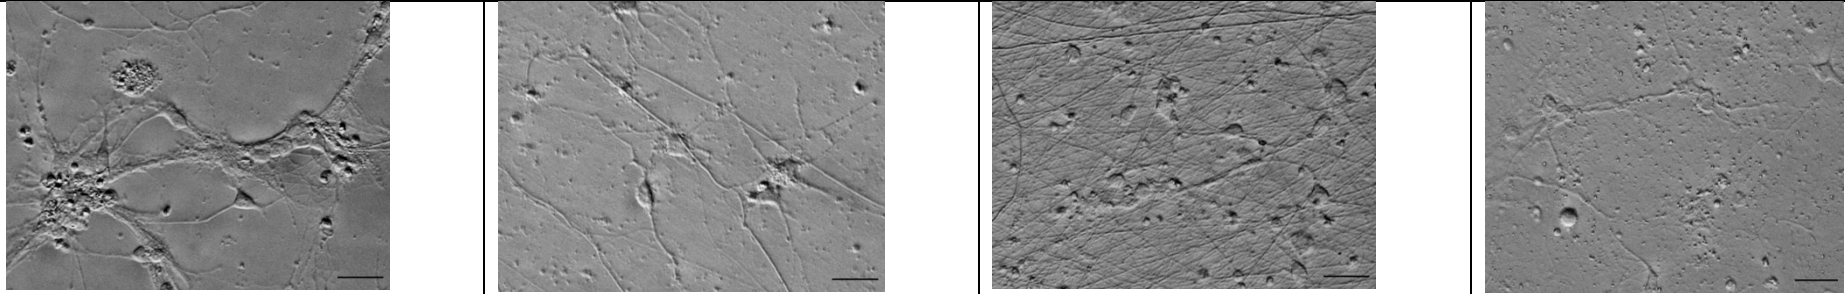

**Figure S3.** Phase contrast microscopic images of rat hippocampal neurons showing the time course of their growth on nylon scaffolds. Control (PDL) - glass coated with poly-D-lysine; AU – aligned ultrathin fibers, AS - aligned submicron fibers, RU - randomly oriented ultrathin fibers; scale bar – 50  $\mu\text{m}$ .

Control

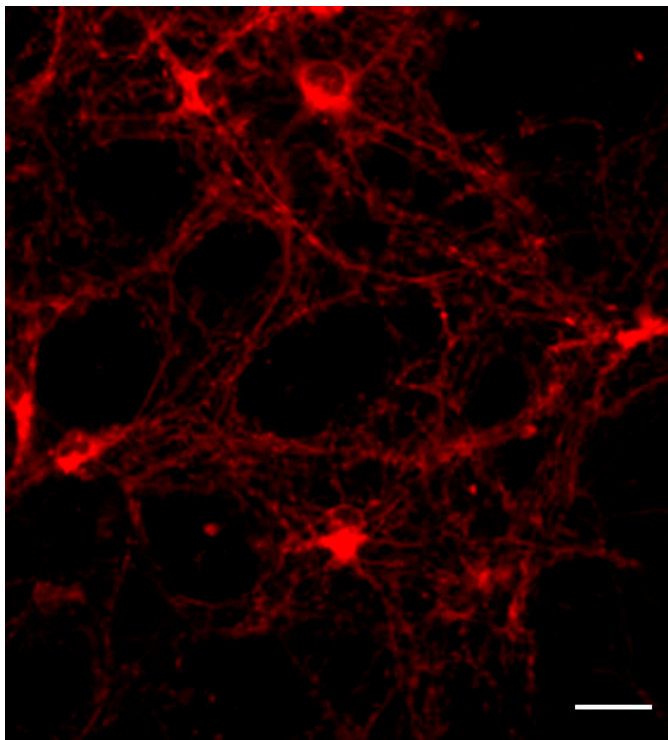

AU

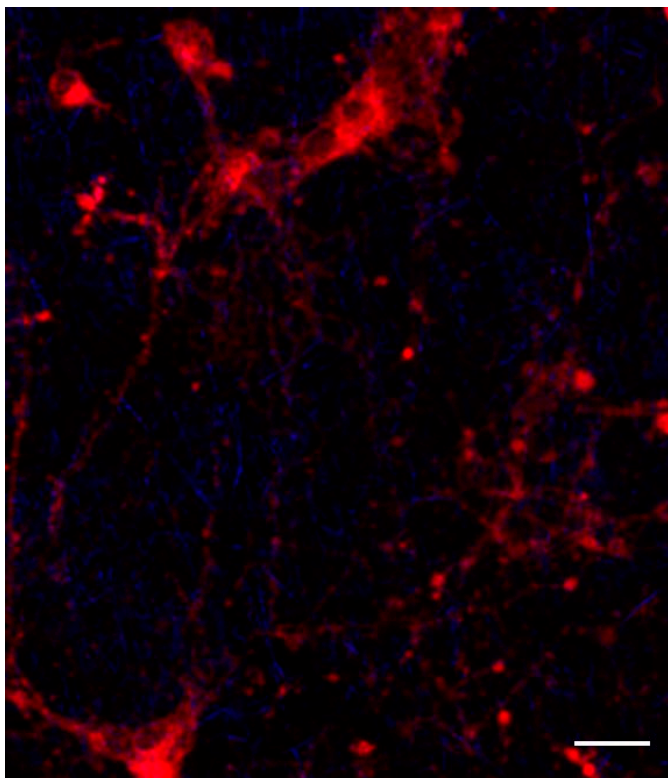

AS

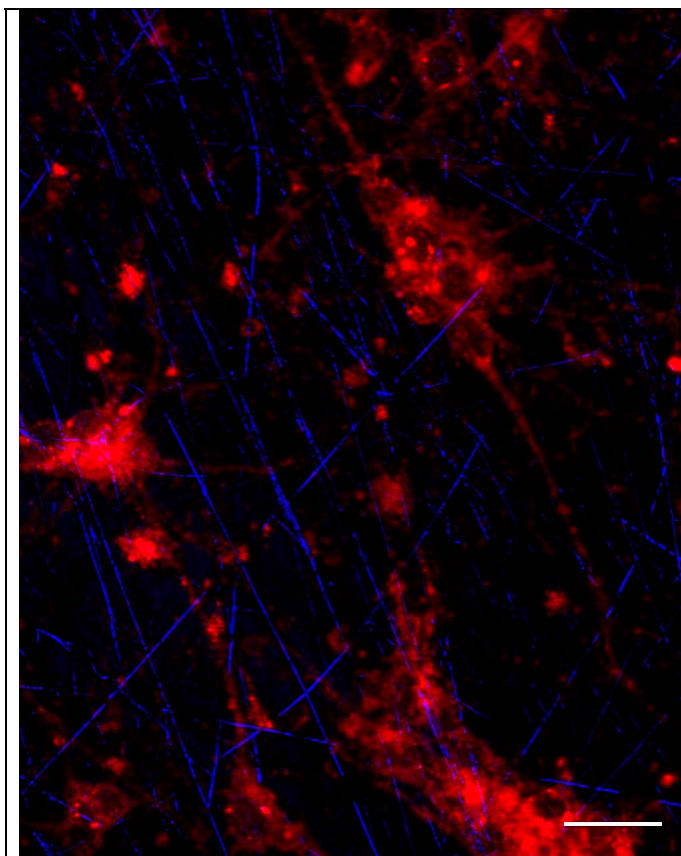

Figure S4. Measurement of neurite diameter using confocal microscopy. Confocal image staining of neuronal cell membranes (Dil dye, red). Scale bar – 20  $\mu\text{m}$ .



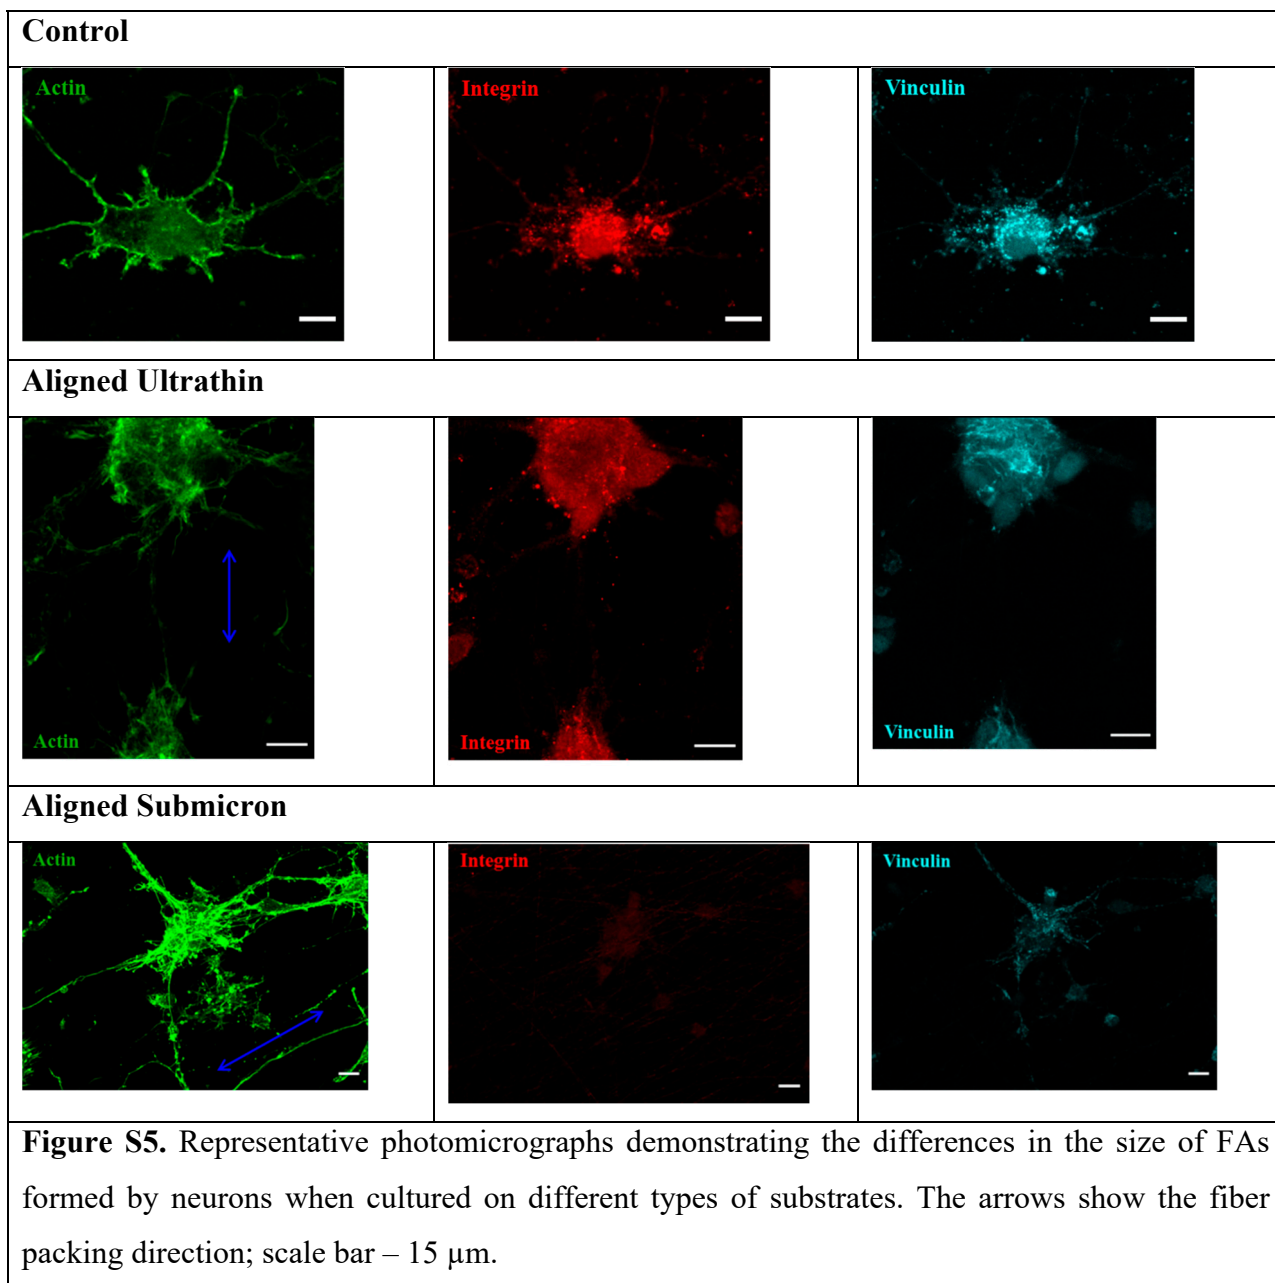



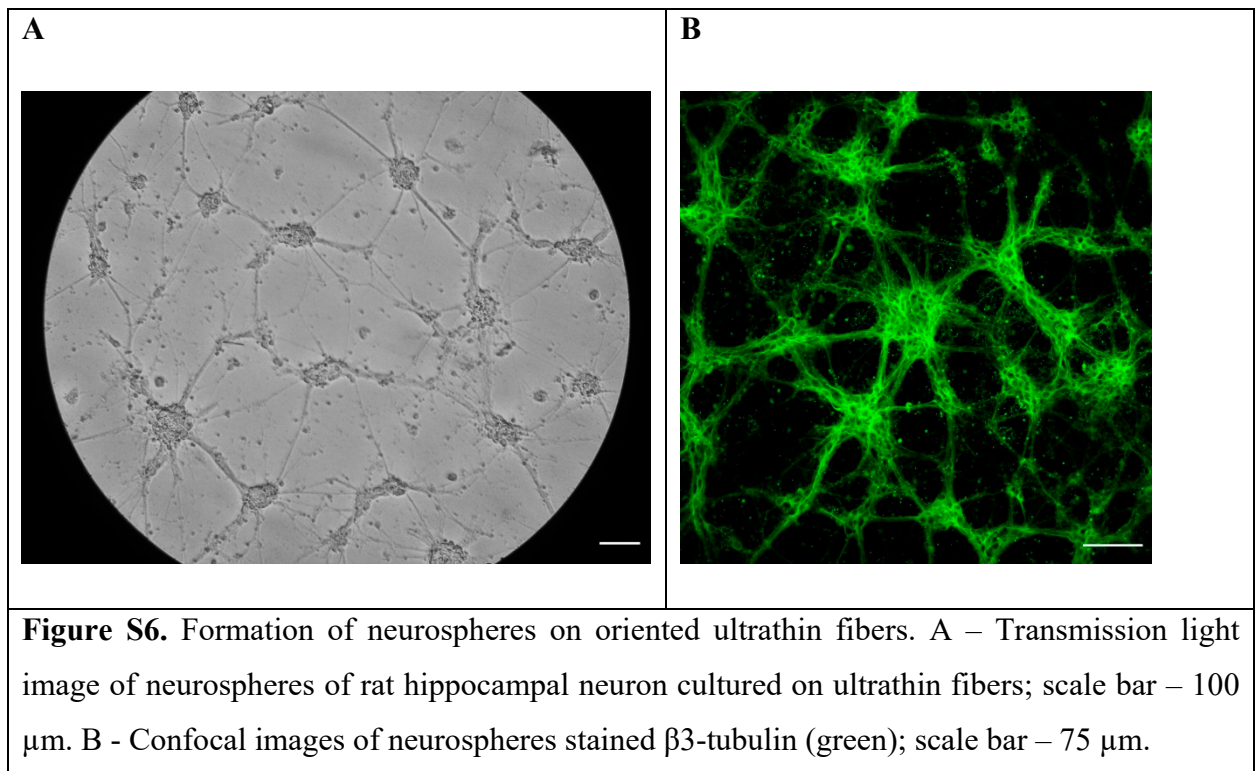

Supplement: s1 [file s1]
